# Supplementary material
Source: PubMed Central journal article supplement (PMC3061290)
Supplement: NIHMS259320-supplement-1.pdf [file NIHMS259320-supplement-1.pdf]

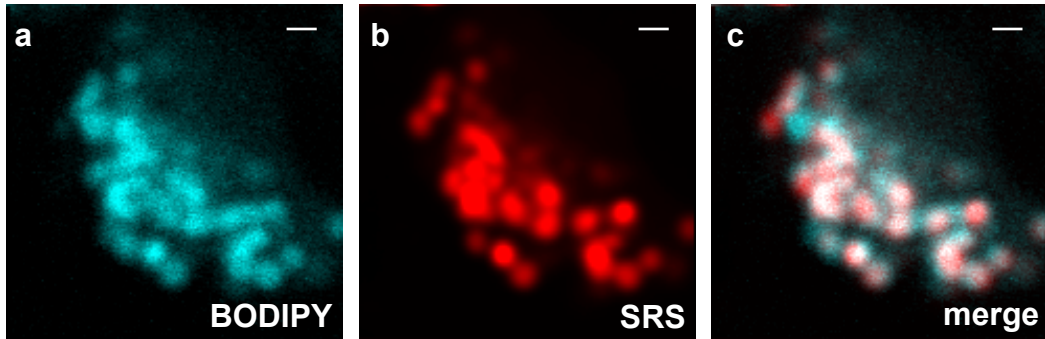

**Supplementary Figure 1. Co-localization between BODIPY and SRS signals in lipid droplets in mammalian 293 cells.**

a) BODIPY staining reveals lipid droplets in living cells.

b) SRS visualization of lipid storage in lipid droplets.

c) Overlap between BODIPY and SRS signals.

Scale bar, 1 $\mu$ m in all figures

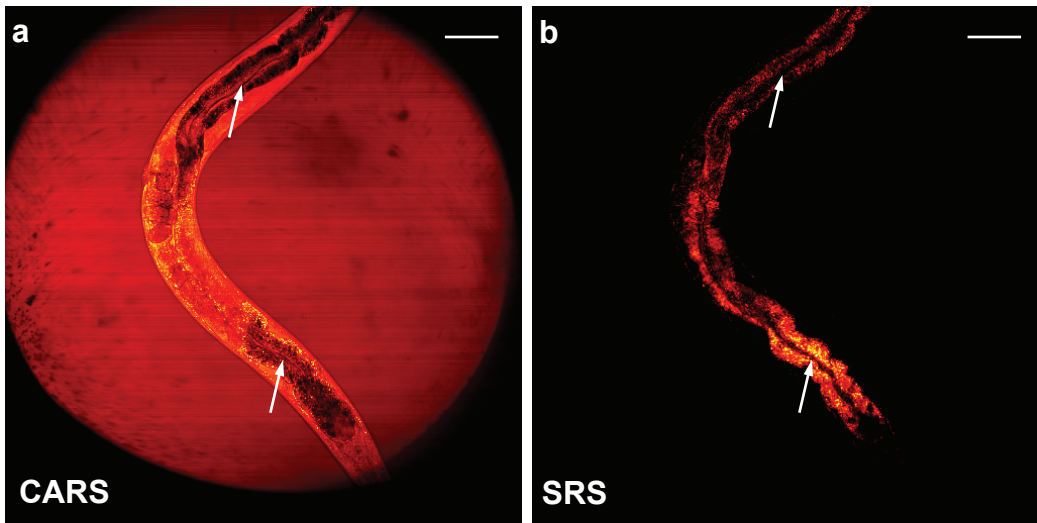

**Supplementary Figure 2. Image artifact of CARS due to lipid unrelated structure.**

a) CARS signals are significantly affected by the shape of imaging samples. As pointed by arrows, the dark regions low in CARS signals are artifact caused by the intestine structure.

b) SRS imaging of the same animal displays a much more homogeneous pattern along the gut.

Scale bar, 100 $\mu$ m in both figures

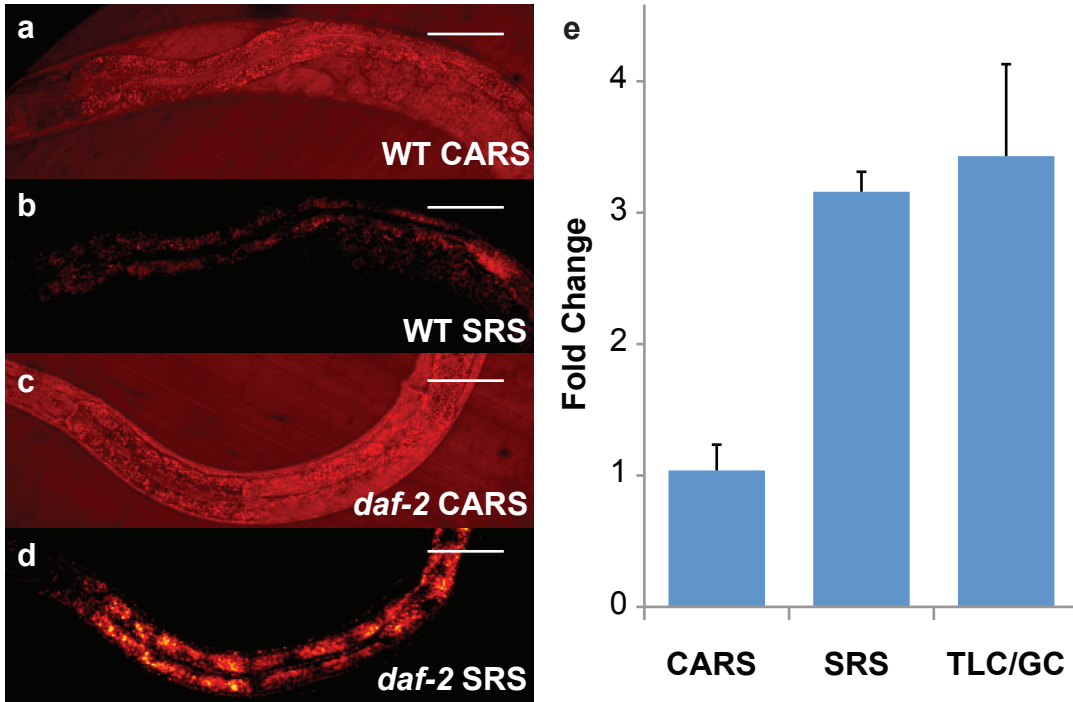

**Supplementary Figure 3. Quantification of fat storage in the *daf-2(e1370)* mutants based on CARS microscopy.**

- a) CARS imaging of fat storage in a wild type adult.
  - b) SRS imaging of fat storage in the same animal in (a).
  - c) CARS imaging of fat storage in the *daf-2(e1370)* mutant.
  - d) SRS imaging of the same *daf-2* mutant in (c).
  - e) CARS microscopy based quantification failed to detect more than 3-fold induction of fat storage in the *daf-2* mutant.
- Scale bar, 100 $\mu$ m in all figures

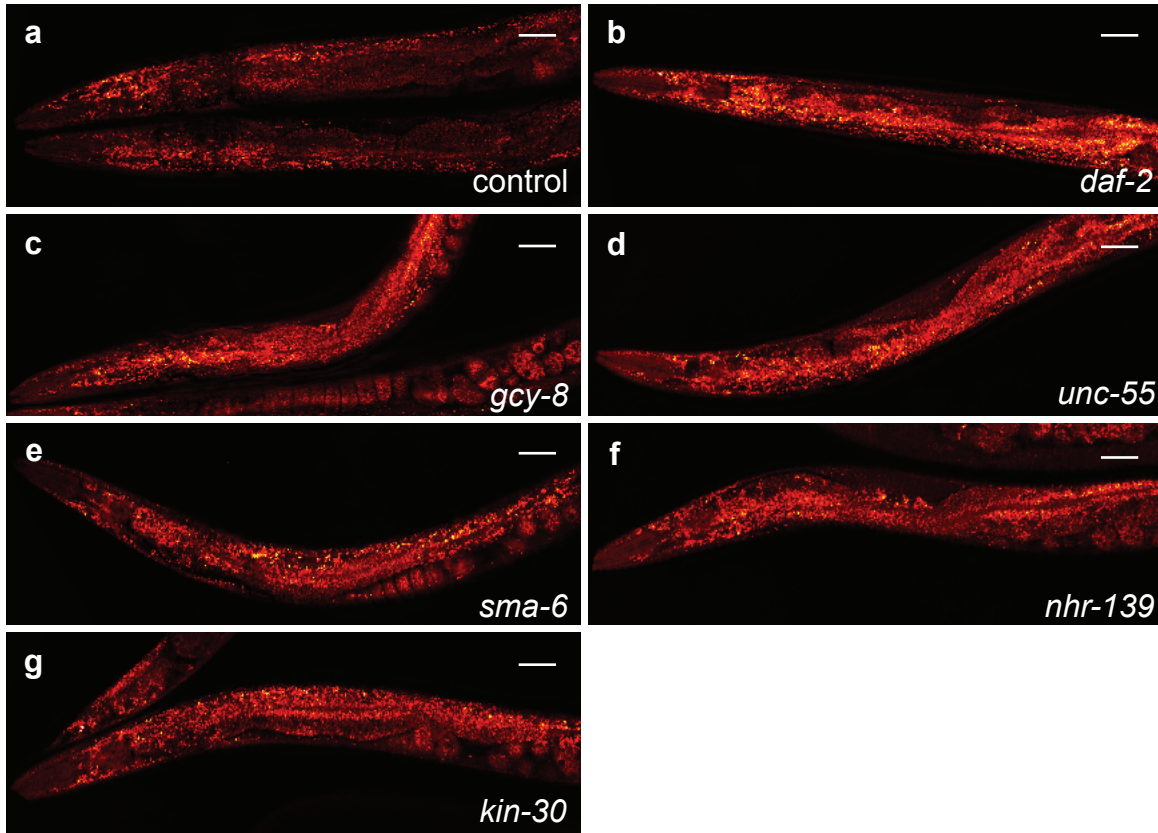

**Supplementary Figure 4. New genetic regulators of fat storage identified using label-free SRS microscopy through RNAi screening.**

a) Control animals fed with empty vector containing bacteria show normal fat content levels.

**b-g)** New genes were identified whose inactivation significantly increases fat storage.  $p < 0.0001$

Scale bar, 100 $\mu$ m in all figures.

**Supplementary Table 1. Summary of newly identified genes responsible for fat storage.**

| <b>Gene</b>     | <b>Brief Description</b>     | <b>Expression Pattern</b>          | <b>Human</b> | <b>SRS Increase <math>\pm</math> STD</b> | <b>p value</b> |
|-----------------|------------------------------|------------------------------------|--------------|------------------------------------------|----------------|
| <i>daf-2</i>    | Insulin/IGF-1 receptor       | Neuron, Muscle, Intestine, etc     | Yes          | 0.56 $\pm$ 0.16                          | <0.0001        |
| <i>gcy-28</i>   | Natriuretic peptide receptor | Neuron, Muscle, Intestine, etc     | Yes          | 0.34 $\pm$ 0.17                          | <0.0001        |
| <i>B0252.1</i>  | FGF receptor                 | Unknown                            | Yes          | 0.54 $\pm$ 0.15                          | <0.0001        |
| <i>sma-6</i>    | Type I TGF-beta receptors    | Hypodermis, Intestine, Muscle, etc | Yes          | 0.41 $\pm$ 0.03                          | <0.0001        |
| <i>R09D1.12</i> | Protein kinase               | Unknown                            | Yes          | 0.46 $\pm$ 0.12                          | <0.0001        |
| <i>kin-30</i>   | Tyrosine Kinase              | Unknown                            | Yes          | 0.26 $\pm$ 0.06                          | <0.0001        |
| <i>unc-55</i>   | COUP transcription factor    | Neuron, Muscle                     | Yes          | 0.37 $\pm$ 0.13                          | <0.0001        |
| <i>nhr-123</i>  | nuclear hormone receptor     | Neuron, Intestine, Pharynx         | Yes          | 0.46 $\pm$ 0.16                          | <0.0001        |
| <i>nhr-139</i>  | nuclear hormone receptor     | Unknown                            | Yes          | 0.37 $\pm$ 0.10                          | <0.0001        |
| <i>nhr-74</i>   | nuclear hormone receptor     | Seam cells                         | Yes          | 0.21 $\pm$ 0.10                          | 0.001          |

“Expression Pattern” column indicates the tissue where each gene is expressing normally. The information is collected from the wormbase [www.wormbase.org](http://www.wormbase.org).

“Human” column indicates whether each gene has a conserved homolog in human.

All the experiments were performed twice independently.
